# Supplementary material
Source: MDPI journal article supplement (https://www.mdpi.com/2073-4344/11/9/1089)
Supplement: s1 [file s1]

## Supporting Information

Noble-metal-free  $\text{Ni}_x\text{S}_y\text{-C}_3\text{N}_5$  hybrid nanosheet with highly efficient photocatalytic performance

Lixiao Han<sup>†</sup>, Cong Peng<sup>†</sup>, Jinming Huang, Linhao Sun, Shengyao Wang,  
Xiaohu Zhang\*, Yi Yang\*

*College of Science, Huazhong Agricultural University, Wuhan 430070, PR China*

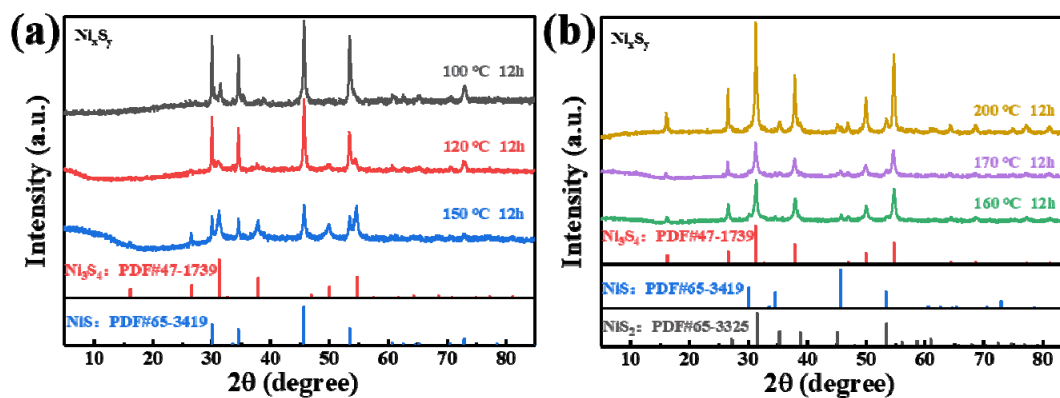

Figure S1. XRD patterns of  $\text{Ni}_x\text{S}_y$  prepared under different hydrothermal temperature.

---

\* Corresponding author.

*E-mail address:* xiaohuzhang@mail.hzau.edu.cn

\* Corresponding author.

*E-mail address:* yiyang@mail.hzau.edu.cn

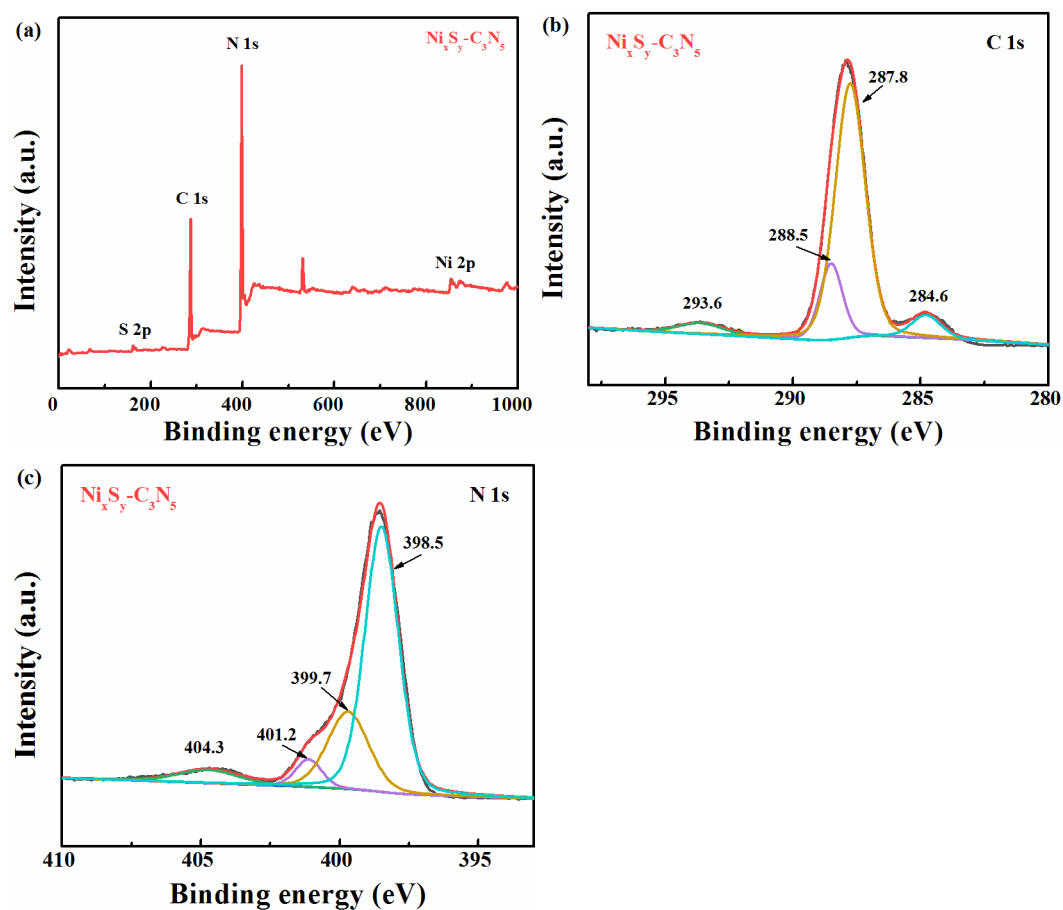

Figure S2. XPS survey spectrum of  $\text{Ni}_x\text{S}_y\text{-C}_3\text{N}_5$  (a) and high resolution spectra of C 1s (b) and N 1s (c).

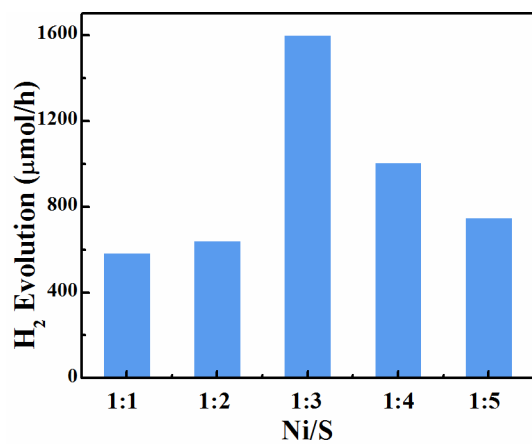

Figure S3. Influence of mole ratio of Ni/S on the  $\text{H}_2$  production activity of 3.0 wt%  $\text{Ni}_x\text{S}_y\text{-C}_3\text{N}_5$ .

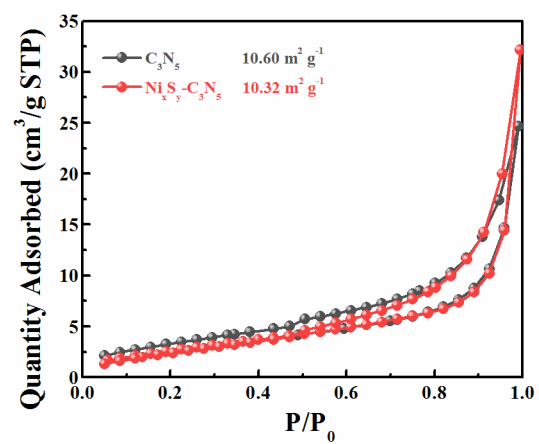

Figure S4. Comparison of nitrogen adsorption-desorption isotherms between  $C_3N_5$  and  $Ni_xS_y-C_3N_5$ .

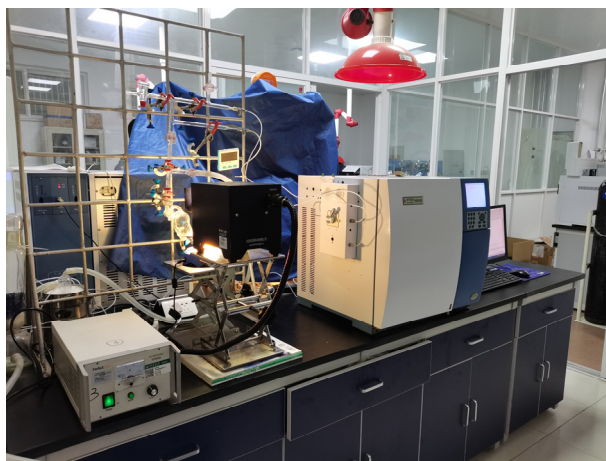

Figure S5. Photograph of photocatalytic  $H_2$  production system.
